# Supplementary material for: Identification of emerging viral genomes in transcriptomic datasets of alfalfa (Medicago sativa L.)
Source: PubMed Central journal article supplement (PMC6902351; doi:10.1186/s12985-019-1257-y), 2019-12-10
Supplement: 12985_2019_1257_MOESM3_ESM.pdf [file 12985_2019_1257_MOESM3_ESM.pdf]

CnVYV-A1\_RNA1

CTCCCAAGAAAAGCAATCTGCGAACTTTGTTACTAATTTGTTTTCTCAACTAGTTATTGGACTTATCCAATTTCAACAAT  
CTTTTGTCTTTCTGTTTCAAGTGCTTTCTGTTGTGCTGCGTAATACAGCTTTCCTTTTGGAAATTCAAGTCTTAACCTGA  
ACAACACCTTCTTTTCTTTATTTCTTTCTTTATCTTTTAGTAACCGCTTAAATTTTCCATGGGTTATTCAAGAGGTGC  
GAGGGGGGGTTCTGATAAGGCAAAGCTTTGTGGAGTGTGCTTTGCTATCTTTCCTGATGTTCAAGGAGAGAAAAGCACACT  
ACAGGAAGTATAACTGCCGTGATGCATCTGGCATCCAGGGTGGTTTAGTGGTCACTGGGAAATGTGCTGCCAGAAAGAG  
AGGAATTTGAGCTCCTATTATGAAACTCAGGAGCTTCTTGCTGATGAAGAGGGTTCAATTGAGCAGATTGAGACCAATT  
CATGTCTGAGTTGCTGGAGTTTACCTCTGGCTACCCGGACGCAGGTTTTAGCTTTGGCACTATCAATGAGAAAGTGCCTA  
AAATAGGTGCTTCTTACCCGGAGGCAATTTATCGTTTCTCGCTCTTTCATGCTGAGGAATATGCCAAGTGGCAATCACAT  
AAACCTGGAGCAGCTGTAAATTTTCTTGCTCCTGATTATGTTCCACTTGCTGATGCTTGCATGAAAGGCGCTCGTTTCGC  
CAAACCCCATGCTGGTCTTTGGGAAAGTAAGACGGATCGTACAGTCTTGGCGGGGATGATATTAATACCGTTTTGATA  
ATGACGATCTTTTGGCAAGACTGATCAGGGCTCAGCAGATTTGTCTTTTCAAGCACTGTTAGGTCTGAGCTCCCGGCT  
TTGCGGACGGTTCAGATTTAACGCAAGCTGATATAAAAACCATGGCATCTGCTTTTCTGATGAGTGGGTGAATGGAT  
TTATTTTGGAGGATTACGAGGAGTTTCTCTCGGATTCTTTTGAAGAATTCTATCCAGACGTCCAGAGTCTCCTCTGG  
AAGAAATTTTGTAGCCAGTAAGTGTCTTGACTCAGCCAGCTCATACCTTCTGGTACTAAGTGGTGTATGATTGGAT  
ACAGAAGATTACCACCCTGTTGCGCCTATAATGAAGTATAGCAACAAAAAGTTTGGTTTGGACTTTGTTGATTATACTGA  
TACAGAGTATTTGGAAGTGCCTGCTGGCAAGTTTTACTGAGACCTGGTTTATAGATGGTCTGCTACCAGGTTTCTGGT  
TTCTGCGTGGAACTCCCATAGATGAGGCAGTGGTGTGTGAAAAGCTCCCACTGATAGGGAAAACCTCCCTAGAGCTCATG  
ATAGAATACCAGGTGCAACCTACTGGTGTCTTCTATTAGATATTCAAAGGGCTCTCTATGCTTATTATGAGCGTGTGGT  
GAAACCCAATAAAAAATATTTTACTTGAATGGGGTCCACATATCTTATTTTGGAGACTGGAGAGCGGATTTGCGCT  
TCCATTTGTTAGCACCATTTGTCCAAGGCAACCAACTGAAACATATGATGGTGTATGAACAGTCCGCTTCCGGGCTGG  
TTACTTACTTCCCGAAAAGGCGTAAGGGAGGTGAAGTGAAGCCAGTGGGTGGAATCCTTCCGCTATTTTTCAAACA  
GGTGACGTTGGGCTTTCTGGATGGGATTGTGGCGAAAACCTCAAGAATCACTTGGCTCGGTTATCTCTGCGCTTGGTTTTG  
TATGGGATTTGATTATTAAGGCCAAGGATTATGTTTTCTCTTTGTTGGAGGATATTATTGCAAGAAAAGCGGATATCTTG  
AAGGCATTGCTCCAACCTGTTCTGTATGTCTGTGGCTTTCTAACCTTTTTAGGGGCTATAAAGAGTCTCAAGTCTATTTT  
GGAACACCACAAAATAGCACTTGACATTCTCACGACAGCGGCTGTGGGGTGGGTGTTTATGTCATGGTAACATTCCTGA  
AACAAGCTCACCTAGGGCTATGAAAAGAGCTACTAGGGTCTGGGAGTTAGTTTGTGGCTGGGACAAGCCAACAGATG  
AAGCAGGCTGATGAAAAGATCCTACAGACATTAGTGAAGAGAACCAGACCAAGAAGAGTGGCTGAAGGGCTTACTGGC  
CTCTCCACACAGTGTGCCAGAGTGTGTATAGATATAACGCACATGAAGGATCTTTTAAATCCCAAGTGTGCCACTTTT  
AAGAGGCCTTTGCTGTGGGTTCTACGGAAGCCTCCTCTGCTGGTATGCTATTTGGTTCAGGATTTATATGGAAGATACTT  
CTCCTTCTTTGTCCCCTCTCCATGTTTGAATCACTAAGACATTGTCCTGTGCTAAGGACTTGATTACAATCCAGGGTGG  
ACAAGATGCTGCTGGTAGGTTCTTCCAGGAAGTTATTGGTGGTACCCAGGAGTTTTTCTACACCTAACGGGTAGCAAAA  
ATGAGTTTCTTGATTATATATGCTACTGTAGGTGTGGATTTCCAGGCCTGGAGAGGAGAGTTTTGGAGTTAAACA  
GCAACCCCAACCTCAATCTTTTGGGACCACAAGAAGCTTTGAAGCGTTTGAAGAGCTGTAAGGATAAAGCAGATCGGCT  
GATACTCCAGATGGACTCTCGGAAAGTCCAGGGGCTTATATCACACACTTTAAACAATCTGCTTCAAAGCCTCGATCGTG  
CTTTGGTGGAAATGCCAGCAAGCTCTTCTGTGGGTAATGGCGGAAAACGCCTGCATGCATCTGGCTTTATGGAGATTCT  
CATGTTGGGAAATCAGTTTGTACCCAATACCTGATTGATGATGTTCTAGACTCCCTTGATTATGCTCAAACCTGGGAGAGT  
CTTTTCCAGGAATGGTTCAGATTCTTTCTGGTCTTGTATAAAAATCAAAGTGCAGTCTTGTATGATGATTTTGGAGCTG  
TTTCTGAGGGTGGACACTTTGATGAGGCAGAGATAATACGTCTGATAGCTCCAGTCCCTCTCCCTTTAAATATGCCAAT  
TTGGAAGCAAAAAGGGAATACTTGTGTCACCTCTGATTTCTGTTTTATAACGGCTAATCAGGCTGGCCTAACACCATCTGC  
TGTTGTTCACTGTAAGAAAGCCTTTGAAAATCGAAGGCTCATTTTAGCTGAGGTTACTGCTGTTGAGGGTGGTCTTACC  
GTGACAGGTATCGTTTTACTATCCACCAGAGGAATGAACCATATGGACGGGATGAGCGCTTCCAAGCTATGAATTATGAA  
CAGTTTCTCCAGTTCACAGTTAACCAATGCAAGCACCATTTTGAAGAACAAGTGGACTTGAGAGATGCCCCGCACACCCA  
GATCTTTGATGCAGCTGATCAAATTGCGGCAGAAGCTGAGGAGGGTTTTAGACAGCTGGAATAGATATTCCTTTTTGTA  
TGCTCAAAAGTTTTAGATGGGGATAAGATCACCTACTACTCACAGGAGTTGTTCAAGGAGATTACTGAAGACCTTTCTCCT  
GAGGATGCTAGTATCATCCGTGCTCGTTTTGGACCCGGGTGTTATAACACAGAGGATGGAGGCGTTATTGCCGAAGGCTGC  
TTTTACTAATCTGAGAACACAGGTTGGTTTAGGTGTTGATCCTTTGAGACACCCAACCCCTATTTTAATTGCACCCAAA

**Additional file 3**

GGGCTAAAGTTGTGGGTCGTTTCATGAAGCCAAAAGTGTGCGAAGCACAAAGTGCAGGAAAAGTAAGAGAAGTTTTGGAGTG  
ATAGTCAAAGAGTTGGTCAAGGGTGCATGTAAATCGCTAGCAGAAGCACCTTTTTTGGTAAAACCTATTCTTGGTTTTGG  
GGCACTTTATTATGTAGGCTTGCCTATCCTTAGTTGGCTTAAGGAATTATATTCAGCCCCTTCACTCCTTACTTTATCTT  
CTCTTGGTGTGTGAGAGCTTCGGGTTCCCTCTCAAGTTCACAGGATCAGGAGACAAGACGTACTGCCTCTGGTAGAGAG  
CGGAGGCGCTATCTTTTGAAGCATCAGGTCCTGGAGCACTTACAGCAAAGCCACAGGATGTTGAGACGGACCTCCGTTT  
CCTCTCTAAGCACTTGGTTGGTTTTACTAGTATAGACTATCCGGATCACCCTATAGAGGAATTGCCCTCGGTGGAACAA  
GAGTTTTGATGGTTTATCATGTTTGGTTGGAATTACAAAAGTGGCTGTTATAAGGTTGGTTCTCCAACAAAAAATTTTCT  
TTCCTGTGAATAGGAAAAATTGTAAGTTCAGCGATTAGGTCTGAAGGATCTTGTACTGATTGACTTTCCCAACTTT  
TGTTTTCTTTTCTGTTTTAAAAATAGAGAAGTGGTTGCTATCATCCCATGATCCCTTTATGGCTGGCTCTGGTTGGTTA  
TGGAGATGCTCTTTCGGGAAAACGGGGTCTGTTGAAGTAGCAAGAGAAGAAGCTGATTACACACTCTTGGATACTAACGAT  
GTTTATGATGCAGCTTTTCTGAAAGGAGTTGGGTTGAACAAATGTGTGCGTTATACCATTTGTGATGATACTGGCACTGG  
CTACCGGAATGATTTCTTCTATGTTTCCAGTGTGGAACCCCTCTGGTCGTAACATATGGGAGAGGGCGAGGGTTAAAAA  
TTGCTTCAATTCATGTGGTTCACCATTTCTCTGCAACTGCTCGTGATACCATCATAGCAGGATCTGGTAGTCTTATCAG  
AAGGAGGAATATCTTGAGGCAAGTTTGTCTTAGGAGATGTCAAGCATCTTTGGAAACAGACCGCATCCAGTCTTCTGG  
TTGTTTGAAGTGGTGAAGAAATTTTTGATGCTGAAACTGTCTTCCAGAGGGTTTACTCACACCTGCTGAAGCTCCAGAC  
AAGCAACCTCTAGTGAGATTAGAAAAAGTTCAATATCTGCTGACTTGGAGTTGTTAACTGGAGAGAAGAGGAAAACAGAA  
CCAGCTATTATAAGTAATAGGGATACTCGCCTTCATGATAAGAATTTGGACATTTTTAAAAAAGGCATGATGAAGTATAA  
AGCAGTGGCTGCTGATATGAGTCCTGTTAACGATGAGGAGGAAAAGATCTGGAATCTCACTTGGGATAGTGTTTTTGATC  
TGCCCGGGGGCATTGCTGGAAAGTGCCACCTTCTTAGTGAGGACGAGAATTTGAATGGTAGAGCTGGAGATAATGAGTAT  
CGTGGCATGGTTGTCTCCACAGTGAAGGTTGGCCTGAAGTCTGAACAGAACAAATGGTGAAGCTGGCAAGGAGAGATT  
TTTGCTTGGTTTGGCGGGTGTATACTTTGAATCGGGCCTTACCAATGTACCAAAGAATCTTAGATATGGACGCGCTT  
CTGAGACTACAATACCTTGCAATTGTTGGACTTGATACAGCCAAAGATGAGCGGTACCATTATCTAAAATATACCAGGAT  
GTGAAAACAAGACTGTTCACAATATTACCCATGGAATATAACTACCTGGTGCGGAAATACTTTGGCTCTTTTGTGTCAGA  
GCTAATGAAGCTACACAACCTGTGTTCCAACAAAAGGTGGGTATCAATCCATTGGGATATGATTGGACAATTCTTGGAAAGC  
GGATGCATTCAAAGGAACCAATTGGTTCAATGGGGATTATTCCCGCTTTGATGGAGTCACGCCACGCTGTTTGTGATT  
GAGATAGCTCATCGTATCACAGCTCTTTATGGAGATCAGCATGGAAC TAGGCGTCTGCATTTAATGTTAGCTGCCACAAC  
ACGATTGGGTGTTGCAGGAATAGGCCTATATCGTGTTTCTGGTGGTATCCCTTCTGGCTTTGCTTTGACAGTTATTGTCA  
ACTCCCTTGAAACCACTTCTTGTCCGTTGGAGCTGGGAGAATATGATGGCAAGCTCTTCCCTTTTCTTTCTGATTGT  
GTAGAGTTGGCAGTTGTGGGTGATGATAATCTTGTGAGTGTGAAGCAGGTGGCTGCAGCAGACTTTAATTTAAGGAAGCT  
TTCTGCTTTCTGAAGAATTATGGCTTCACTTTGAAAGATGGTTCTGATAAGAATAAGGAAGAGCTGCCGGACTTTAATC  
CACCAGAAAAATGTGACTTTCTGAAGCGGTGTTTCAAAGCAAGGGGTGACCCTTATTTGGCACCTCTCTTGGCTCTCT  
CTTTCTGAGTCATTACATTGGGTGCGGGAGACCAACATGAGTAATGCCGCTGCTACGCAAAACAATGTTGAGGGCTTTTT  
GCGTGAATTGTTTCAATACGGAGATAAAGAGTTGTATTGCAAGTGGAGGAGGGATCTTATAGAGTTGTGTGCTAGAAATA  
GAGTTCCTTCTCCTGCTAGTTACACTTTTGGAGGTTAGAGCGTGCTTGGCTTTCAGGGCGACAGTAGCTTCGATTTTT  
GAAAAAGAAGAGCCTGAGCTCATTGTTATCAGAGATGCAGCCTCTGATATCGTCCTGATGTTACATTGTACCTGTGCA  
GCAATGTTTAAAGTGGAACTCAAGTGAATGCCCTTAGTGGTGTGGTGTGGTCCCAATTGTCCAAATCAGCTTAAGA  
CGAATAGCTGTTTTGCCATTACAGGCACCTCAGGGTTC AAGTATCCTCTGCGCAATACGGTGC GCAATTTGCTGCGCAA  
GTGCACCAACGGGGTGACAAAGTCTACTTCACAGGCGCTCTAGACCAATCTTTGGTTTATTGGGTGGCTGCTTTTTATGC  
TTCCATGTATCGTGACTTTTTCATCATTCTGCTTATATGAAAGCATACTTTGGAGATGATGATAGGGGTTTGTCTCGCTG  
CAGTTACAGCTGCAAAAGGATGGTAGTTTTCTTCTTAGTTTTGTTTTCTCCGGGGTCTTCCATGCTTCTTAAATTGGTT  
GAGTGTGTTTGTACACCCCTTTGCTTTCTTTGTTTCCATAAAGGATTAACCAGGCATCCTCCTACTCTGGTAGGTTT  
AGTTCTGGCTTTAGAAAAGCTTTAAAAA  
AAAAAAAAAAAAAAAAAAAAAAAAAAAAAAAAAAAAAAAAAAAAAAAAAAAAAAAAAAAAAAAAAAAAAAAA  
AAAAAAAAAAAAA

**CnVYV-A1\_RNA2**

CTCTGGTTTTGAAAAGCAATCTGCGAACTTTGTTACTAATTTGTCTTCTCAACTAGCTATTGGGCTTATCCAATCTTAACG  
ATCTTTCGCTCTTCTTGTCTCTTATTTCTTTTGGTTGTGCTGCGGTTATACAGCTTTCCTCGTTGGAATTCAGGTCTTA

**Additional file 3**

ACCTGAACAACCTGTTCTTTGTTCTGTTTGTCTCTCCGCATTAATTTTCTTTGGAGTTTCAAACCTTTTCAACAACGTTTAC  
ATTAAGCAACTTGAGTACCCCGATTTGTCAAGTTAGGGGTTTTTGTTTTTCTACTTTCTTTCTCAGAGCACTATTGTTG  
GTTTGTTTTTCTTTACTATTTTATATTTGTATTCTCTTTTGTTTTCTGGATGGCTTCTTTCTTTTCTCGCCGG  
TCACCAAAGGAAATGCCTAATGTTCCCTCCTATACTCCTAAGGAGATGGAGGTACTGAAAGCTGCCATTACTGAATGTGG  
CATGAATTACGCTGATGTAGTGAGAGCTGCACAACTGAGAGTGGCAAGATGGCCCTTCTCACTGCTGCAAACACTAGTC  
AGCTGAAGAGTCTTGTTGCAACAACAGCAACGAGCAATTCTCTGCCCCGTTTGCGGGAGAAGCCTAAAGCTGTTGTTTAT  
GTTTCTGAAGGGGTGGGTAGGCAAGTCTTTGTGATGATAAGCTAACTCACCAAACACTGTTGTTTCTACTCCTGAGCC  
CCTCTTTAAGAAGATGAAGGAGAAAAAATTAAGAATGGTAAAGATACAGGGGGGGAAGAACCAAAATACCGTTCAGCTG  
ATATTTGTACAATACAGCTTGAGTACCTCCCATCTCTCGGGCCATTCTAACCAAATAGCTGGTGTAGTTCTTCTGGAC  
GGGAATAGGTCAACACAAGAGCAAGCTGTTCTCGGAATAGGGGTCTTCTCTTTATGAGGCACACTCTCATGCTCTGTT  
TGCACCAAGGCTCAACGTCCACTATGATGATCCAAATTTTGTGGACCGATTACAGTTGTTAACTACCTTCTCAGATGATG  
TTTTAGGGGGTGGCTCACCTGCTATGCTCTATAGTACCATTTTCAAGTTGTTAGGCATAATATAGCTGATGCCATTACTTG  
CCAGATCCACTACCTTATTCTAAGCTTAAAGAAAAATACCCTTGTGGTGTTCGGGGTCTCTGTAATTTTTCAGGCTGCTGA  
GATAGCGCTCTACAACCTGCTCGTCTGACGCGTAGTGCCTCTACATTTCTATAACAACGTGCAGGAAC TAAGACGGTTC  
TAACCTTTGAGGATACAGTTGCTCAGGTGAAGGAACAGCAACCCATTCAAGGCAGAGCTTCTTCTCTTTGCAAATGTT  
TCATATGGTCAGCAGGACAGGGTGGCATTGGCTAGTAATTTACCACAGAAGTGCCAATTTTATAACAAGATAGGTTGCC  
TTGTGCTCAACATACTGGTAGAACTGAAGCAAGTGGGGACCACCATGAGGAGTTGGTTCCAGCTTCAAGATGGTGGTACAG  
AGGGACAGTTCTTTTCCCCCAGCCTGTGGTGCATCCACCAGACTCTAAGTTTGTGGTTCTCATCCCTTTTCTTTCCG  
GTAACCTCTAATGTTGGAACAGTTGTTTATACTTTACCGTTATTCTGAACCTCTTTGAAGGATACTGAGTATGGTAGGTT  
TTATAAGGGATATCGCTACCTTCGGTGCAAACCTACTGTTTCGATTAATTTGGTTTCAGGTTCCATACAGGCTAAGGGTCTTT  
TGTGGCTTTGTTATGACCCTTCTGAACTCTGGCTAAATATCCAAGTAGAGAGAGGGCTTTGGCTCTACAAGGAACCTGG  
TTTATGCCTGGACGGCACGATTCCGGCTCCTTACTGTTATGGAATTAGCAACTCCAGCTGGTTTTTGTGACATGGACAC  
TGATGTCAATGGGGCCTTTAAGGTGGTTATTATTAATAAATTTGGCTAACCTTGGACGCTACTGATTATGGTATGGAACCTT  
CTTTGTATTTGGAAGTGGAAAGAATAGGCTTGGGTGATATAACTGTTGGTGGGGAAATTGACGAGTTTCTATCCCTTGCGA  
CAGATAGTACTTGACTATGAGTTGTCCACTACAACCTTCTAAAGGGAAGGCCTTAGTTCTACCCTTGAACCCCTTGCTGCC  
AGCTTGCGATGATGCCAGTTTTATCCTAGCTGCTCTTCTTCCATTTTGGAGAATCATAGATATTGGAAAGGTACTCTTT  
CGTTAGAAGTGATTTTCAATATGCCTGCTATGGCTGGTGGTATTGCTGAACTGGCCTTCGTTATGATACTTATGACCAG  
GCCGATGGTGACACCTACCGCCGTTTTGGTTCTCTGTGGTTGACCTAAGGGCTCATCGTATATTAAGAGCTAGAGTGCC  
TCTTAGTGGATATGGGGTTATCTTGTGGTGGTTGAGGCTCTTTTTTGGAGTTAAGCCACAGACTGGTTTTGGGGACG  
TCCTAAAATTAGTTATTTTGTTCACAGCCCTCTCCATATAAGTGATACTTCAAAGAGAGGGTCTGTCCTTGTAGGTAT  
CTTGGTTTGGAGGACCTGGATTATCTAGAGCCAGCCACATCAATTGGGAGGTTGAATCTAAAACCACCTTGGTACCAA  
TACAGCTGCTTCTGGGGGGCTATCATAAAAAGTAGTACTGCAGAATGGGAGGAACCTTTTATAGCTCGAGTTCCCTTGG  
GCTTGCGCCAGAAGACTTTTTGTTTTGATGACAATAAACAAATGGTCTCCTTCTGGCTTTCTCTATTTTCTGTTTCTCCT  
GCGGTGCATTTACCACGAACCTGCTGGTGGTTTTGAGGCTTCAATGGAGCAGCAATGCCCTCTGATGCATCGGAGCCAGGA  
GAATTGTCAATGGAGGGGACTTTGAGGTACCACTTACTGCCCCGTTTAGAGGGAGCTACACCGCAGTCACTACTCCCC  
ATCGTTCTCTTACCTTCTCTGCTGTTCTTGTAGTAAGATCCTTCCAGCACCTGTTTTTGTGGATAATAGCACTTTTAAA  
CCACTACTTCTTTGCTGTCAGTGAGGGATACTTTCTTTTGGAGCAGGATCATCCCTTGTAGAGTTCTCCACTCCCC  
AGGAAGATGGATAAATACCCACTTTGGTGCAACTGAACAGTACACTTGGCGTACTTGTCCCCTGTGGGTTCTCCTCCAGT  
TTCCACCTAAAACCTATGGCGCAATTGCATGTAAGGGACGTGTCTTGTGGGTTGAACCAACTATAGAGTATAGACATCCT  
ATGGGCGGTTTTCCATTAACCTATTCTGAACCTTACCAGCGCCAAAGTACTTTTTTGGAGAACACTTTTAAATGTAGGTTG  
AGTTATTTCTTTTCTTTTCTATTATGGATCTTCCATACCTGCTCTTATTAGTTTTTGTGGTTGTTGTATCCTATAATG  
TTTTGTTGTTTTCTTTGGGGTCTCCCATGCTTTCTTAATTTGGTTAAGTGTGTTTTGTTACACCCCTTTGCTTTCTTTG  
TTTCCATAAAGGATTAACCAGGCATCTCCTACTTTGGTAGGTTTAGTTCTGGCTTTGGAAAAGCTTTAAAAA  
AAAAAAAAAAAAAAAAAAAAAAAAAAAAAAAAAAAAAAAA

**CnVYV-A2\_RNA1**

CCTTGTCTTCGTGCTTTCTGTTGTGCTGCGGTAATACAGCTTCTCTTCTGGAATTCAAGTCTTAACTTGAACAACATTTT

**Additional file 3**

CTTTCCTTTATTTCTTCTTTCTTATCTTTTAGTAACCGCTTTAATTTTCCATGGGTTACTCAAGAGGTGCGAGGGGGGGT  
TCTGATAAGGCAAAGCTTTGTGGGGTGTGCTTTGCTGTCTTTCTGATGTTCCAGGAGAGAAAAGCACACTATAGGAAGTA  
CAACTGCCGCGATGCATCTGGCATCCAGGGTGGTTTGGTAGTCACTGGGAAATGTGCTGCCAGAAAAGAGAGAAATCTGA  
GCTCCTACTATGAACTAAGGAGCTTCTTGTCTAATGAAGATGGCTCAATTGAACAGATTGAGACCCAATTCATGTCTGAG  
TTGCTGGAGTTTACCTCTGCCTACCCAGAAGCAGGCTTTAGCTTTGGCACAATTAATGAGAAAAGTGCCTAAAATAGGTGT  
CTCTTATCCAGAGGCAATTTATCGTTCCTCGTTCCTCCATGCTGAGGAATATGCTAAGTGGCAATCACATAAACCTGGAG  
CAGCTGTGAATTTTCTTGTCTGATTATGTTCCACTTGCTGATGCCTGTATGAAGGGCGCTCGTCTCGCCATCCCTAAT  
GCTGGCCTTTGGGAGAGTAAGACGGATCGTACTGGTCTTGGTGGGGACGATATTAATACCGTTTTGACAATGATGATCT  
TTTTGCCAAGACCGATCAGGGACTTAGCAGATTTGTCTTTTCAGGCACTGTTAGATCTGAGCTTCCAGCTTTACGGACGG  
TTCCAGATCTGACGCAAGCTGACATAAAGACTATGGCACATGCTCTTTCTGATGAGTGGGTTGAATGGATTTACTTTGAG  
GAGGATTACGAGGAGTTTCTCTCGGATTCTTTTGAAGAATTCTATCCGGATATCCCAGAGCCTCTATTGGAAGAAATTC  
TAGCCAGTAAGTGTGGATTGAGTACTCGTATCTTCTGGTACTAAGTGGTGTATGATTGAGACACAGAAGATT  
ACCATCCTGTTGCGCCTATAATGAAGTATAGCAACAAAAAGTTGGTTTGGACTTTGTTGATTATACTGACACGGAGTAT  
TTGGAGGTGCCTACTGGTAAGTTTATACCGAGACCTGGTTTGTAGATGGTCTGTTACCAGGTTTCTGGTTTTTGCCTGG  
AACTCCTATAGATGAAGCAGTGGTGTGTGAGAACTTCCGCTGATAGGGAAAACCTCCTTAGAGTCTATGATAGAGTACC  
AAGTGCAACCTACTGGTGTCTCTATTGGACATTCAAAAGAGCTCTTTATGCTTATTATGAGCGCTGGTGAAGCCCAAT  
AAAAAATATTTGATTTGAATGGGGTCCACATACCTTATTTTTGAAGATTGGAGGGCAGATTTGCGCTTTCATTTGCT  
AGCACCATTTGTTCAAGGTAACCAACTGAAGCATATGATGGTGTATGATGAACAGTCCGCTCCCAGGATGGCTTCTTGATT  
TTCCAAAAGGCGTAAGGGAGGTGGAGTGCAAGCTAGTGGGTGGAATCCCTCCGCTATTTTTCAAACAGGTGACACTG  
GGCTTCTGGATGGGATTATGGCGAACTCCAAGAGGCACTTGCCCAAGTTATTTCTGCTTTGGTTTTGTATGGGATTT  
GATTATCAAAGCCAAGGATTATGTTTTTCTTTGTTGGAGGATATCATTGCTAGGAAAGCAGATATCTTGAAGGCATTGC  
TCCAACCCGTTCTCTATGTTTGTGGTTTCTAACTTTCTTAGGGGCTATAAGGAGTCTCAAGTCTATTTTGAAGCCAT  
AAAATAGCACTTGACATTTACAACAGCGGCTGTGGGGCTGGGTGTCTATGTGATGGTGACATTCCTAAAACAAGCTAA  
CCTTGGGGCTATGAAGAGAGCCAGCAGGATTTGGGAATTTGGTTTGTGGCTGGGATAAGCCAACCTGAGATGAAACAAGCTG  
ATGAAAAGATCCTACAGACATTAGTGGAAAGAGCATCCAGACCAAGAGAGTGGTTAAAGAGCTTACTGGCCTCCCACAT  
AGTGTGCCAGAGTGTGTTATAGATATGACACACATGAAGGATCTTTAAATCCCAAGTGTGCCACTTCCAGGAGGCTTT  
TGCTTTGGGTTCTACAGAGGCCTCTTCTGCTGGTATGCTATTTGGTTCGGGATTTATATGGAAAATACTTCTTCTCCTTT  
GCCCTCTTCTATGTTTGGAGTCTCTAAAACATTGTCTTGTGCTAAGGATTTGATTACAATCCAAGGTGGTCAAGATGCT  
GCTGGTAGGTTCTTCCAGGACGTGATTGGTGGCACCCAGGAAGTTTTTTACACTTAAACAGGTAGCAAGAATGAATTTCT  
TGATTATATATGCTACTGTAGGTGTAGATTTTCCAGGCTGGAGGGGAGAGTTTTTGGAAATTAACAACAGCAACCCCAA  
CCTCAATCTTCTTGGGACCACAGGAACGTTTGAAGCGTTTGAAGAGCTGTAAGGATAAAGCAGATCGGTTGATACTTCCAG  
ATGGATTCCCGAAGGTCCCCGGAGCTTATATCACACATTTTAAACAATTTGCTTCAAAGTCTCGATCGTGTCTAGTGGGA  
GTGTGAGCAAGCCCTTTCTGTGGTAAATGGCGGAAAACGCCTGCATGCATTTGGCTCTATGGAGACTCTCATGTTGGGA  
AGTCAGTTTGCACCAATACTTGGATTGATGATGTTCTAGACTCCCTTGATTACGCTCAAACCTGGGAGAGTTTTCTCCAGG  
AATGGTTCAGACTCTTTTTGGTCTTGTACAAAAATCAAAGTGCTATTTTGTATGATGATTTTTGGGGCTGTTTCTGAGGG  
TGGACACTTCGATGAGGCGGAGATAATACGCCTAATAGCTCCAGCTCCTCTCCCTTAAATATGCCAAATTTGGAAGCAA  
AGGGGAACACTTGCTGTACTTCTGATTTTGTCTTACATAACAGCAAATCAGGCTGGCCTAACACCATCTGCTGTGCTCCAT  
TGTAAGAGAGCCTTTGAAAACCGAAGACTCATTTTAGCTGAGGTCACTGCTGTTGAGGGTAGTCGATACCGTGACAGGTA  
CCGTTTTACTATCCACCAAAAAGAATGAGTCATATGGGCGAGATGAGCGTTTCCCAGTTATGAATTATGAGCAGTTCTCTCC  
AATTTACAGTCAACCAGTGAAGCACCATTTTGAAGAACAGTGGACTTGAGAGATGCCCCACATACCCAGATCTTTGAT  
GCAGCTGATCAGATTGCAGCAGAGGCTGAGGAGGGTTCCAAACAGCTGGCATAGATATCCCTTTTGCATGCTCAAAG  
TCTAGATGGGAATAAGATTACCTACTACTCCAGAAGTTATTCAAGGAGGTTACTGAGGACCTTTCTCCTGAGGATGCTG  
GTATCATTCTGCTCGTTTAGACCCAGGTGTTATAACACAGAGATTAGAGGCGTTGCTGCCGAAGGCTGCTTTTACTAAT  
CTGAGAACACAGGTTGGTTTGGTGTGATCCTTTTGAAGACACCTAATCCCTATTTTAAATGCACTCAAAGGGCTAAAGT  
TGTGGGCCGTTTTATGAGACCAAAAAGTGTGAGAAGCACAAATGCAGGAGAACAAGAGAAGTTTCGGAGTAGTGGTTAAAG  
AGTTGGTTCAGGGTGCATGCAAATCGCTATCAGAAGCACCTTTTCTGGTAAAACCTTATTCTTGGTTTTGGAGCACTTTAT  
TATGTGGGCTTACCTATCCTTAGTTGGCTCAAGGACCTATATTACGCCCTTCACTTCTTACTTTATCTTCTCTCGGTGT  
TATCAGGGCTTCAGGTTCTCTTTCAAGCTCTCAAGACCAAGAAAACGAGACGCACTGCCTCTGGTAGAGAGCGGAGGGCGT

**Additional file 3**

ATCTTTTGAAGCATCGGGTCTGGGGCACTTGACGAAAGCCACAGGATGTTGAGACGGATCTCCGTTCCCTTTCCAAG  
CATTTGGTTGGTTTTACCAGTATAGACTATCCAGATCACCCTACAGGGGATTGCCCTTGGTGGGACAAGAATTTTGAT  
GGTTTATCATGTTTGGTTGGAATTGCAGAACGGTTGTTATAAGGTTGGCTCTCCAACAAAACTTTTCTTTCACTGTAA  
ATAAGAAGAATTGTAAGTTCCAACGACTGGGTCTGAAAGACCTTGTGTTGATTGATTTCCCTCCAACTTTCGTTCTTTT  
CCTGTCTTAAAGATAGAGAAGTGGTTGTTATCATCCCATGATCCCTTCATGGCTGGCTCTGGTTGGTTTATGGAGATACT  
CTTCCGGGAAAATGGGGTCGTTGAAGTAGCCCGAGAAGAAGCTGATTACACACTTTTGGATACCAATGATGTTTATGATG  
CAGCTTTTCTGAAAGGAGTTGGGTGAACAAATGTGTGCGTTATACCATTTGTGATGATGCTGGCACCAGGCTACCGAAAT  
GATTTCTTTTATGTTTCTCAGTGTGGAACCTCTGGTTGCCAATACGGGAAAGGGCGAGGATTAAGATAGCTTCAAT  
CCATGTGGTCCATCATTCTCCGCAACTGCCCGTGACACCATTATAGCAGGATCTGGTAGTCTCATTACGAAGGAGGAAT  
ATCTTGAGGCAAGTTTGCTTTAGGAGATATCAAGCATCCTTTGAAACAGACCCTATCCAGTCTTCTGGCTGTTTGAGT  
GGTGGAGGAGTTTTTGGATGCTGAAACCGTCTTTCCGGAGGGTTACTTACACCTGCTGAAGCTCCTAGACAAGCAACTTC  
TAGTGAAATTAAGAGATTCAATATCCGCTGACTTGAGCTATTGACTGGAGAAAAGAGAAAACAGAACCAGCTATCA  
TAAGTAACAGGGATACTCGCTGCATGATAAAAACTTGGACATCTTAAAGAAAGGCATGATGAAGTATAAAGCAGTGGCT  
TCTGATATGAGTCCCGTTACTGATGAGGAGGAGAAGGTTTGAACCTCACTGGGATAGTGTCTTTGATTTGCCTGGGGG  
TATTGCTGGGAAGTGCATCTTCTAGCGAAGATGAAAATCTGAATGGTAGGGCTGGAGACAATGAGTATCGTGGTATGG  
TTGTGTCCACCAGTGAGGGCTGGCCTGAAGTTCTGAATAGAACAAATGGTGAAGCTGGCAAAGAAAGATTTCTGCTTGGT  
TTGCCGGTTGTTACTCTGAATAGGGATTTGCCAATGTATCAAAGAAATTTAGATATGGATGCTCTTCCGAGACTAC  
AATACCTTGTATTGTTGGACTTGATACAGCCAAAGATGAGCGGCTGCCATTATCTAAAATATACCAGGATGTGAAAACAA  
GATTGTTACAATATTACCTATGGAGTACAACCTACCTGGTGCAGAAATACTTTGGCTCTTTTGTGAGAGCTAATGAAA  
TTACATAATTGTATCCCAACAAAAGTGGGCATCAATCCGTTGGGATACGATTGGACAATCCTTGGGAAGCGGATGCACTC  
AAAAGGAACTAATTGGTTCAACGGGGACTATTCCCGCTTTGATGGAGTACACCCGCGCTGTTTGTGATTGAGATAGCTC  
GCCGTATTACAGCCCTTTATGGAGATCAGCATGGAAC TAGGCGTCTGCACTTAATGTTAGCTGCCACAACACGATTGGGT  
GTTGCAGGAATAGGCCTATACCGTGTCTTGGTGGTATCCCTTCTGGTTTTGCCTTGACAGTTATTGTCAACTCCCTTGT  
GAATCACTTTCTTGTCCGTTGGAGTTGGGAGAACATGATGGCAAGTTCCTCTCTCTTTCTGATTGCGTGGAAATTGG  
CAGTTGTGGGTGATGATAATCTTGTGAGTGTGAAACAGGTGGCTGCAGCAGATTTTAATTAAGGAAGCTTTCTGCTTTT  
TTAAAGAATTATGGTTTTCACTCTCAAAGATGGTTCTGATAAGAACAAGGAAGAGCTGCCAGACTTTAATCCACCAGAAAA  
GTGTGACTTTTTGAAGCGGTGTTTTAAGGCAAGGGGTGATCGTTATCTGGCACCTTTTCTTGGCTCTCTTTTCTGAGT  
CGTTGCATTGGGTGCGGGAACTAATATGAGTAATGCTGCTGCCACACAAAATAATGTTGAGGGTTTTTGTGCTGAGTTG  
TTCCACTACGGTGACAAGGAGCTGTACTGTAAATGGAGGAGAGATCTTATAGAGCTGTGTGCTAGAAATAGGGTTCCTTC  
TCCTGCTAGTTACACATTTGAGGAGCTAGAGCGCGCTTGGCTTTCAGGTCCGACTGTAGCTTCGATTTTTGAAAGAGAAG  
AACCCGAGCTCATTGTTATCAGGGATGCAGCTTCTGATATAGCTCCTGATGTTACATTATACCTGTGCAGCAATGCTTA  
AAGTGGAGCTCAAGTGAATGCCCTTAGTGGTGTGGTGTGGTCCCAATTGTCCAAACCAGCTCAAGAACTCAAATAGCTG  
TTTTACCATTACGGCACCTCAAGGTTCAAAGTACCCTTTGCGTAATACGGTACGCAATTTGCTACGTAAGTGCACCAAC  
GGGGCGATAAGGTTTACTTTACAGGCGCTCTGGATCAATCCTTGGTTCAGTGGGTGGCTGCTTTTTATGCTTCCATGTAT  
CGAGATCTTTTATCACTCTGCTTATATGAAAGCGTACTTTGGAGATGATGACAAGGGTTTGTCTCTGCGGTTACAGC  
CGCAAAAGGATGGTAGTTCCCTCTTAGTTTTCGCTTTCTTGGGGTCCCTCATGCTTTCCTTGATTGGTTAAGTGTGTTT  
GTTACACCCCTTTGCTTTCTTTTGTCCATAAAGGATTAACCAGGCATCCTCCTACTTTGGTAGGTTTAGTTCTGGCTT  
TAGAAAAGCTTTAAAAAAAAAAAAAAAAAAAA

**CnVYV-A2\_RNA2**

CATGTAACAACCTGAGCAACACGGTACCCGAGTCATTGAAAAGCAATCTGCGAACTTTGTTACTAATTTATTTCTTCAAT  
TAGCTATTGGGCTTATCCAATTTAACGATCTTTTCGCTTTCTTTTCTTATTCTTGGTTGTGCTGCGGTTATACAG  
CTTTCTTATTGGAATTCAGGTCTTAACCTGAACAACCTGTTCTTTGTTCTGCTTGTCTCTCCGATTAATTTTCTTTGG  
AGTTTCAAACCTTTTACAACGTTCACTTTAAGCAATTTGGATACCCCGATTTGTCAAGTTAGGGTTTTTGTTTTTCTTA  
TTTTCTCTCAGACTACCATTGTTGGTTTGTCTTTCTTTTACTATTGTATATTTGCGTTCCTCCTTTTATCTTTT  
GGATGGCTTCTTTCTTTTCCCGCGTTACCAAAGGAGATGCCTAATGTTCCCTCCTACACTCCTAAAGAAATGGAAGTG  
CTTAAAGCTGCCATTACTGAATGTGGCATGAACTACGCTGATGTGGTGGAGAGCTGCACAACTGAGAGTGGCAAATGGC

**Additional file 3**

CCTTCTTACTGCTGCAAATACTAGTCAGCTTAAGAGTCTAGTTGCAACAACAGCAACAAGCAACTCTCTTGCTCGTTTGC  
GGGAGAAGCCCAAAGCTGTTGTCCATGTTTCTGAAGGGGTGGGTAGGCAAGTCCTTTGTGATGACAAGCTAACTCATCAA  
ACCACTGTTGTTTCATACTCCTGAGCCTCTCTTTAAGAAGATGAAGGAGAAAAAACTCAAGAATGGTAAAGATACAGGAGG  
GGAAGAACCAAAAATACCGTTTCAGCTGATATTTGTACAATACTTGGAGTAACCTCCCATCTCTCGGGCCATTCCAACC  
AGATAGCTGGTGTGGTTCTTTTGGATGGGAATAGGTCAACACAGGAACAAGCTGTTCTTGGAAATAGGGGTTCTTCCTCTT  
TATGAGGCACATTCTCATGCCTTATTTGCACCAAGGCTTAATGTCCACTATGATGATCCAAATTTTGTGGACCGGCTGCA  
ATTGTTGACCACCTTCTCGGATGATGTTCTTGGGGGTGGCTCACCTGCTATGTCCATAGCACCATTTCAGTTGTTAGGC  
ATAATATAGCTGATGCCATTATTTGCCGGACCCACTGCCATACTCCAAACTAAAAGAGAAAATACCTTGTGGTGTTCGA  
GGTCTCTGTAACCTTTCAAGCTGCTGAAATAGCACCTCTTCAGCCTGCCCGCTTGACGCGTAGTGCTTCTACATTCTAT  
ACAACGTGCAGGGACCAAAACGGTCTTAACCTTTGAGGATACAATTGCTCAGGTGAAGGAACAGCAACCCATTACGGCAC  
GAGCTTCTTTCTCCTTTGCGAATGTCTCCTATGGTCAGCAGGACAGGGTAGCATTGACCAGTAATCTACCACAAAAGTGC  
CAATTTTCATAACAAGATAAGCTGCCCTGCGCCAACACACTGGTAGAGCTGAAGCAAGTGGGGACCACCATGAGGAGTT  
AGTTCCAGCTTCAGATGGTGGTACAGAGGGACAGTTTTTCTCCCCCAGCCTGTGGTACATCCTTCAGACTCCAAGTTG  
TTGGTTCTCATCCCTTCTCCTTCCCGTAAATTCTAATGTTGGTACAGTTGTTTACACTTTACCAATTATTCGTACTTCT  
TTGAAGGATACTGAGTACGGTAGATTTTACAAGGGATACCGCTACTTGCAGGTGTAGACCTACTGTTTCGATTGATTGGCTC  
AGGTCCTATAACAAGCTAAGGGTCTTCTGTGGCTCTGCTATGACCTTCCGAAACTCTGGCTAAATACCCGAGTAGAGAGC  
GGGCTTGGCTCTACAAGGGACTTGGTTTATGCCCGGACGGCATGATTTCGGCAACTTTGACTGTTATGGAGCTAGCTACT  
CCAGCTGGCTTTTTCGATATGGACACTGATGTCAATGGGGCCTTCAAAGTAGTCATTATTAAGGACTTGGTTAATTTTGA  
TGTCAACGATTATGGTATGGAGCTTCTCTGTATTTGGAAGTGGAGAGGATAGGTTTGGGTGATATAACTATTGGTGGGG  
AGTTGACTAATTTCTATCCCTTGCAGCAGATAGTACTTGATTATGAGTTGTCTACAACAACCTCAAAGGGAAGGCTTTA  
GTTTTGCCCTTGAATCCCTGTTGCCAGCCATGATGATGCTCAGTTTTATCCTAGCTGCTCTTCTTCCATTTTGGAGAA  
TCATAGGTATTGGAAGGAACTCTTTCGTTAGAAGTATTTCAATATGCCTGCCATGGCTGGTGGTATTGCTGAACTGG  
CCTTTGCTTATGATACTTATGACCAGGCTGATGGTGCACCTATCGCCGTTTTGGTTCTTCTGTGGTGCATTTAAGGGCT  
CATCGTATACTAAGAGCAAGAGTGCCTCTTAGTGGATATGGGGTTATCTTGCTGGTGGTTCCGGCTCCCTTTTTGAGGT  
TAGGCCGAGACTGGTTTTGGGGATGTTCTAAAATTAGTTATTTTTGTTTACAGCCCTCTTCATATAAGTGATACCTCAA  
AGAAAGGGTCTGTTCTTGTAGATATCTTGGTTTGGAGAAGTGGATTATCTAGAGCCAGCCACATCGATTGGGAGACTA  
AACCCTAAAACCACCCTGGTGCCAAATACAGCTGCCTCTGGGGGGCTATCATAAAAAGTGGGTACCGCAGAGTGGGAGGA  
ACCCTTCATAGCCGAGTTCCTTTGGGTTTGCGCCAGAAGACTTTTCGTTTGTGACAATAAATAAATGGTCCCCTTCTG  
GCTTTCTTTACTTTCTGTTTACCTGCAGTTCATCTACCACGAACCGCTGGTGGTTTTGAGGCTTCATTGGAGCAGCAA  
TGCCCCTTGATGCATCGAGCCAGGAGAATTGTCAATGGAGGGGCACTTTGAAGTACCATTGACTGCCCGTTTGGAGGG  
AGCTACACAGCAGTCACTACTCCCCATCGTTCTTACCTTCTCTGCTGTTCTCCTGAGCAAAATCCTTCCAGCACCTT  
GCTTTGTGGATAATAGCACTTTTAAACCATTACTTCTTTTATTGTGAGTGGGACACTTTCTCTTTGGAGCAAGATCAT  
CCCTTTGTGGAGTTCTCCACTCCTCCAGGAAGATGGATAAAATACCCACTTTGGTGCAAACGAGCAGTATACCTGGCGCAC  
TTGTCCTGTGTGGGTTCTTCTTTCAGTTCACCTAAAATATGGCGCAATTGCATGTAAGGGATGTGCTTTTGTGGGTCG  
AACCAACTATAGAGTATAGACATCCTATGGGTGGTTTCCCACTGACTATTCCTGAACCTTACCAGCGCCAAGGTACTTT  
TTTGAAGAATACTTTAATGTAGGTTAAATTTCTTTTCTTCTTTTGGCTATGGATCTTCCACATCTACTTTTATTAGTTG  
TTTGTGGTGTATATCCTACTTTCTTATTGTTTTCTTGGGGTCTTTCATGCTTTCCTTAATTGGTTAAGTGTGTTG  
TTACACCCCTTTGCTTTCTTTTGTTCATAAAGGATTAACCAGGCATCCTCCTACTTTGGTAGGTTTAGTTCTGGCTTT  
AGAAAAGCTTTAAAAAAAAAAAAAAAAAAAAAAAAAAAAAAAAAAAAAAAAAAAAAAAAAAAAAAAAAAAAAAAAAAAA  
A

**LycMoV-A\_RNA1**

ACGCAATCTGCGAACTTTGTTACTAATTTGTTTCTCAACTAGCTATTGGGCTTATCCAATTTTAAACAATCTTTCACCTC  
CTTCTTTCAAGTGTTCCTGTTGTGCTGCGGTTATACAGCTTTCCTTTTGGAAATCAAGTCTTAACTTGAACAACATTTT  
CTTTCCTTCATTTCTTCTTTCTTATCTTTTAGTAACCGCTTTAATTTCCATGGGTTATTCAAGAGGTGCGAGGGGGGGT  
TCTGACAAGGCAAAGCTTTGTGGAGTGTGCTTTGCTGTCTTCTGATGTTTCAGGAGAGAAAAGCACACTACAGGAAGTA

**Additional file 3**

TAAGTCCGTGATGCATCTGGCATCCAGGGTGGTTAGTGGTCACTGGGAAATGTGCTGCCAGAAAGAGAGGAATCTGA  
GCTCCTATTATGAAACTAAGGAGCTTCTGGCTGGTGAAGATGGTTCAATTGAACAAATTGAGACCAATTCATGTCTGAG  
TTGCTGGAGTTTACCTCTGCCTACCCAGACACGGGCTTTAACTTTGGCACAGTCAATGAAAATGTGCCTAAAATAGGTGC  
CTTTACCCGGAGGCAATTTTTCTGTTCCCGTTCTTCCATGCTGAGGAGTACACTAAGTGGCAATCACATAAACCTGGAG  
CAGCTGTAAACTTTCTTCTGCTGACTATATTCCACTTGGCTGATGCTTGTATGAAGGGCGCTCGTTTCGAAAAGCCCCAT  
TCTGGCCTTTGGGAGAGTAGAAGGGATCGTACTGGTCTTGGTGGAGACGATATTAAATATCGTTTTGATAATGATGATCT  
CTTTGCCAAGACTGATCAGGGCCTTAGCAGATTTGTCTTTTCAGGCACTGTTAGGTCTGAGCTTCCAGCTTTGCGGACGA  
TTCCAGATCTAACGCAAGCTGATATAAAAACTATGGCATGCACTCTTTCTGATGAGTGGGTGAATGGATTTATTTTGGAG  
GAAGATTACGAGGAATTCCTCTCGGATTCTTTTGGAAAATTTTATCCAGACATCCCGGAGCCTCTTCTGGAAGAGATTT  
TAGTCCAGTAAGTGTGTTTGGACTCAGCTAGCTCGTATCTTCCCTGGTACTAAGTGGTGTATGATTACAGACACAGAAGATT  
ACCACCCTGTTGCACCCATAATGAAGTATAGCAACAAAAAGTTTGATTTGGACTTTGTTGACTATACTGATACAGAGTAT  
TTGGAGGTGCCTGCTGGCAAGGTTTATACTGAGACCTGGTTTATAGATGGTCTGTTGCCAGGTTTCTGGTTTCTGCGTGG  
AACTCCCATAGATGAAGCGGTAGTATGTGAGAACTTCCGCTGATAGGGAAAACCTCTAGAGCTCATGATAGAATACC  
AGGTGCAACCCACTGGTATCTTCTATTAGATATCCAAAAAGCTCTTTATGCTTATTATGAGCGTGTGGTGAACCCCAAT  
AAAAAATATTTTGAATTTGAATGGGGTCCACATACCTTATTTTTGAAGATTGGAGGGCAGATTTGCGCTTCCATTTGCT  
AGCACCGTTTGTCAAGGCAACCAATTGAAGCATATGATGGCGATCATGAACAGTCCGCTTCCGGGCTGGCTCCTTGATT  
TCCAAAAAGGCGTAAGGGAGGTGGGGTGAAGCTAGTGGGTGGAATCCCTCCGCTATTTCTCAAAACAGGTAACACTG  
GGCTTTCTGGATGGGATTATGACGAACTCCAAGAAGCACTTGGCCCGTTATTTCTGCTCTTGGTTTTGTATGGGATTT  
GATCATCAAAGCCAAGGATTATGTTTTCTTTTCTGCTGGAGGATATCATTGCTAGGAAAGCGGATATCTTGAAGGCATTGC  
TCCAACCTGTCTTTATGTTTGTGGTTTCTAACCTTTTTAGGGGCCATAAAGAGTCTCAAGTCTATCCTGGAACATCAT  
AAAATAGCACTTGACATTTACGACAGCGGCTGTGGGGCTGGGTGTTACGTCATGGTAACATTTCTAAAACAAGCTAA  
CCTTGGGGCTATGAAAAGAGCCTCTAGAATTTGGGAGTTAGTTTGTGGTTGGGATAAGCCAACCGAGATGAAACAAGCTG  
ATGAGAAGATCCTACAGACATTAGTGGAGGAGCATCCAGACCAAGAAGAGTGGTTGAAGAGCTTGTGGCTTCTCCACAT  
AGTGTGCCAGAGTGTGTTATAGATATGACGCATATGAAGGATCTTCTAAATCCCAAGTGTGCCACTTCCAAAGAAGCTTT  
CGCATTAGGTTCTACAGAAGCCTCCTCTGCTGGCATGCTATTTGGTTCAAGGATTTATATGGAAGATACTTCTTCTCCTTT  
GTCCTCTCTCCATGTTTGGAGTTTCAAAAACACTGTCTTGTGCTAAGGATCTGATTACAATTCAGGTGGTCAAGATGCT  
GCTGGTAGGTTCTTCCAGGACGTGATTGGTGGTACTCAGGAAGTTTTCTATACTTAAACAGGTAGCAAGAATGAATTTCT  
TGATTATATACGCTACTGTAGGTGTGGACTTCCAGGCTTGGAGGGGAGAGTTTTTGAATTAACAACAGCAACCCCAA  
CCTCAATCTTTTTGGGGCCACAGGAGCGTTTTGAAACGTTTGGAGGCTTGTAAAGGATAAAGCAGATCGGTTGATACTCCAG  
ATGGACTCCCGAAAGTCCAGGGGCTTATATCACACATTTAATAACTTACTTCAAAGTCTTGACCGTGTCTTAGTGGA  
ATGTCAGCAAGCTCTTTCTGTGGGTAATGGCGGAAGACGCCTGCATGCATCTGGCTTTATGGGGATTCTCATGTTGGGA  
AGTCAGTTTTGTACCAATATTTGATTGATGATGTTCTGGACTCTCTTGATTATGCTCAAACCTGGGAGAGTCTTTTCCAGG  
AATGGTTCAGATTCTTTTTGGTCTGTTATAAGAACCAAAGTGCAATCTTGTATGATGATTTTGGAGCTGTTTCTGAGGG  
TGGACACTTCGATGAGGCGGAGATAATACGCCTAATAGCCCCAGCTCCCCCTCCCTTAAATATGCCAAATTTGGAAGCAA  
AGGGGAACACTTGTGTACCTCTGATTTTGTTTTTATAACAGCTAATCAGGCTGGCTTAACACCATCTGCTGTCTCCAT  
TGTAAGAGAGCTTTTGAACCCGAAGACTCATTTTGGCTGAAGTTACTGCTGTTGAGGGTAGTCGTTACCGTGATAGGTA  
TCGTTTTACTATCCACCAGAAAAATGAGTCATATGGGCGAGATGAGCGTTTCCAGTTATGAATTATGAACAGTTTCTCC  
AATTCACAGTCAACCAATGCAAGCATATTTTGGAGGAACAAGTGGATCTGAGAGATGCCCCACATACCCAGATCTTTGAT  
GCAGCTGATCAGATTGCGGCAGAAGCTGAGGAGGGGTTCAAGACAGCTGGAATAGATATCCCTTTTGTATGCTCAAAAG  
CCTAGATGGGAATAAGGTTACCTACTACTCTCAGAAGTTGTTCAAGGAGGTTACTGAAGACCTTTCTTCTGAGGATGCTG  
GTATCATCCGTGCTCGCTTAGATCCAGGTGTTATAACACAGAGACTGGAGGCGTTGTTGCCGAAGGCTGCTTTCACTAAT  
CTGAGAACACAGGTTGGTTAGGTGTTGATCCTTTTGGAGACACCTAACCTTATTTCAATTGCACCCAAAGGGCTAAAGT  
TGTGGGTCGTTTTATGAAACCAAAGTGTGAGAAGCACAAATGCAGGAGAATAAGAGAAGTTTTGGAATGGTGGTCAAGG  
AGTTGGTCCAAGGTGCATGTAATCATTAGCAGAAGCACCTTCTGGTGAACCTTATTCTTGGTTTTGGAGCACTTTAT  
TATGTAGGTCTACCTATCCTTAGCTGGCTCAAGGACCTATACTCAGCCCCCTTCACTTCTTACCTTATCCTCTCTTGGTGT  
TATCAGGGCTTTCAGGTTCTTTTCAAGTTCTCAGGACCAGGAAACGAGACGTAAGTGCCTCTGGCAGAGAGCGGAGGGCGCT  
ATCTTTTAGAAGCATCGGGTCTGGGGCACTTGCAGCAAAGCCACAGGATGTTGAGACGGATCTCCGTTCCCTTTCTAAG  
CATTTGGTTGGTTTACCAGTATAGACTATCCAGACCACCACTATAGAGGAATTGCCCTCGGCGGAACAAGAATCTTGAT

**Additional file 3**

GGTTTATCATGTTTGGTTGGAACCTACAGAATGGTTGTTACAAGTTGGTTCCCAACAAAACTTTTCCTTTTACTGTGA  
ATAAGAAGAATTGCAAGTTCCAACGATTGGGTCTGAAAGACCTTGTGTTGATTGATTTTCCTCCAACCTTCGTTTCTTTT  
CCTGTTTTAAAAATAGAGAAGTGGTTGTTGTCATCCCATGATCCTTTTATGGCTGGCTCTGGCTGGTTCATGGAGATACT  
TTCCGGGAGAATGGGGTCTGTTGAAGTAGCCAGAGAAGAAGCTGATTATACACTCCTGGATACTAATGATGTTTATGATG  
CAGCTTTTCTGAAAGGAGTTGGGCTGAATAAATGTGTGCGTTACACCATTTGTGATGATGCTGGTACTGGCTACCGGAAT  
GATTTCTTTTATGTTTCCAGTGTGGAACCTCTGGTTGCTAACTACGGGAAAGGGCGAGGATTAATAAATTGCTTCAAT  
CCATGTGGTTCATCATTCTCCGCAACTGCCCGGATACCATTATAGCAGGATCTGGTAGTCTTATTACGAAGGAGGAAT  
ATCTTGAGGCAAGCTTGCTTCTAGGAGATATTAAGCATCCTTTGGAAACAGACCGTATTCAATCCTCTGGTTGTTTGGT  
GGTGAAGAAATTTTTGATGCTGAGACTGTTTTTCCAGAGGGTTTACTCACGCCCTGCTGAAGCTCCTAGACAAGCAACTC  
TAGTGAAATTAGGAAGAGTTCAATATCTGCTGACTTGGAGTTGTTGACTGGAGAGAAGAGGAAAACAGAACCAGCTATCA  
TAAGTAACAGGGACACTCGCCTTCATGATAAGAATTTGGACATCTTTAAGAAAAGGCATGATGAAGTATAAAGCAGTGGCT  
TCTGATATGAGTCCCATTAGTGATGAGGAGGAAAAAGTTTGGAACTCTACTTGGGATAGTGTCTTTGATTTGCCAGGGGG  
TATTGCTGGGAAGTGTACCTTCTTAGTGAAGATGAGAATCTGAATGGTAGAGCTGGGGATAATGAATACCGTGGTATGG  
TTGTGTCCACCAGTGAAGGTTGGCCTGAGGTTCTGAATAGGACAAATGGTGAAGCTGGCAAGGAAAGATTTTTGCTTGGT  
TTGCCAGGTTGTTACACTTTGAATAGAGCCTTGCCAATGTATCAAAGAATTTTAGATATGGACGCTCTTCCGAGACTAC  
AATACCTTGATTGTTGGGCTTGACACAGCCAAAGACGAGCGGCTGCCGTTATCTAAAATATACCAGGATGTGAAGACAA  
GATTGTTTACAATATTACCTATGGAATACAACCTACCTGGTGCGAAAAACTTTGGCTCTTTTGTGTCAGAGCTAATGAAA  
TTACATAATTGCATTCCAACAAAGGTAGGTATCAATCCGTTGGGATATGATTGGACAATCCTTGGGAAGCGGATGCACTC  
AAAAGGAACCAATTGGTTCAATGGGGACTACTCCCGCTTTGATGGAGTCACACCGCGTTGTTTGTGATTGAGATAGCTC  
GTCGATTACAGCCCTTTATGGGGATCAGCACGGAAGTAGGCGTCTGCACTTAATGTTAGCTGCCACAACACGATTGGGT  
GTTGCAGGAATAGGTCTATACCGTGTCTTGGTGGTATTCCCTCTGGCTTTCCTTAAACAGTTATTGTCAATCCCTTGT  
AAACCACTTCTTGTCCGTTGGAGTTGGGAGAATATGATGGCAAGCTCCTCTCTCTTTCTGATTGCGTAGAATTGG  
CAGTCGTGGGTGATGATAATCTTGTGAGTGTGAAGCAGGTGGCTGCAGCAGATTTAATTTAAGAAAGCTTTCTGCTTTC  
TTAAGAATTATGTTTTACCCTCAAAGATGGTTCTGACAAGAATAAGGAAGAGCTGCCAGACTTTAACCCACCAGAAAA  
ATGTGACTTCTTGAAGCGGTGTTTTCAAGGCAAGGGGCGATCGTTACTTGGCACCTCTTCTTGGCTCTCTTTCTGAGT  
CATTACATTGGGTGCGGGAAACTAATATGAGTAATGCTGCTGCCACACAAAACAATGTTGAGGGCTTTTTGCGTGAGTTG  
TTTCACTACGGTGATAAAGAAGTGTACTGCAATGGAGGAGAGATCTTATAGAGCTGTGCGCTAGAAACAGAGTTCCCTC  
TCCTGCTAGTTATACTTTTGGAGGCTAGAGCGTCTTGGCTTTCGGGTGCGACAGTAGCTTCGATTTTTGAAAAAGAAG  
AGCCTGAGCTCATTGTTATCAGGGATGCAGCCTCTGATATAGCTCCTGATGTCCACATTGTACCTGTGCAACAATGCTTG  
AAGTGGAACTCAGGTGAAATGCCTTTAGTGGTGTGGTGTGGTCCCAATTGTCCAAATCAGCTCAAGAAGCTCAATAGCTG  
TTTTGCTATTACAGCACCTCAGGGTTCTAAGTACCCTCTGCGCAATACGGTACGCAATTTGTTGCGTAAAGTGCACCAAC  
GGGGTGATAAGGTCTACTTTACAGGCGCTCTGGATCAATCTTTGGTTTATTGGGTTGCTGCTTTTTATGCTTCTATGTAT  
CGGGATTCTTTTCACTCCGATTATATGAAAGCATACTTTGGAGATGATGATAAGGGTTTGTCTCTGCGGTACAGC  
CGCAAAGGGATGGTAGTTTCTCTTAGTTTTGCTTTCTTGGGGTCTCATGCTTTTCTTAGTTGATTAAGCGTGT  
GTTACACCCCTTTGCTTTCTTTTGTTCATAAAGGATTAACCAGGCATCCTCCTACCCTGGTAGGTTTAGTTCTGGCTT  
TAGAAAAGCTTTAAAAAAAAAAAAAAAA

**LycMoV-A\_RNA2**

CGGGAAAAGCAATCTGCGAACTTTGTTACTAATTTGTTTTCTCAACTAGCTATTGGGCTTATCCAATTTTAAACGATCTTT  
TGCTCTTCTTGTCTTCTTATTTCTTGGTTGTGCTGCGGTTATACAGCTTTCTTATTGGAATTCAGGTCCTAACCTG  
AACAACTGTTCTTTGTTCTGTTTGTCTCTCCGATTAATTTTCTTTGGAGTTTCAAACCTTCCACAACGTTTACATTAA  
GTAACCTGAATACCCGATTTGCCAAGTTAGGGGTTTTTGTCTTTCTTATTTTCTTTCCAGACCCTATTGTTGGTTTA  
TTTTTCTCTTTTACTATTGTATATTTGTGTTCCACCTTTTGTCTTGGATGGCCTCCTTCTTTTCTCGCCGATCACC  
AAAGGAAATGCCTAATGTTCCCTCTATACTCCTAAAGAGATGGAGGTGCTGAAAGCTGCCATTACTGAATGTGGCATGA  
ATTATGCTGATGTGGTGAAGAGCGGCACAACTGAGAGTGGCAAGATGGCCCTTCTCACTGCTGCAAACACTAGTCAGCTG  
AAGAGTCTTGTGCAACAACAGCAACGAGCAACTCCCTTGTCTGTTTGGGGAAAAGCCTAAAGCTGTTGTTTCATGTTTC



**Additional file 3**

TGAAGGGGTGGGTAGGCAAGTCCTTTGCGATGATAAGCTAACCCACCAAACCACTGTTGTCCACACTCCTGAGCCTCTCT  
TTAAGAAGATGAAGGAGAAAAAACTTAAGAATGGTAAAGACACAGGAGGGGAAGAACCAAATACCGCTCAGCTGATATT  
TGTACAATACAGCTTGGGGTGACCTCCCATCTTTTCGGGCCACTCTAACCAAATAGCTGGTGTAGTTCTTTTAGATGGGAA  
TAGATCAACACAAGAGCAAGCTGTTCTTGGGAATAGGAGTCTTCTCTTTATGAGGCGCACTCGCATGCTTTGTTTGCAC  
CAAGGCTCAATGTCCACTATGATGATCCAAATTTTGTGGACCGTTACAATTGTTGACTACCTTCTCAGATGATGTTTTA  
GGGGGTGGCTCACCTGCTATGTCCTATAGCACCATTTAGTTGTTAGGCATAATATAGCTGATGCCATTACTTGCCAGA  
TCCACTACCCTATTCCAAGCTTAAAGAGAAATACCCCTGTGGTGTTCGGGGTCTCTGTAATTTCCAAGCTGCTGAGATAG  
CGCCTCTGCAACCTGCCCGTAAACGCTAGTGCTCTTATATTCCTATACAACGTGCAGGAATAAGACGGTTTTAAACC  
TTTGAGGATACAGTTGCTCAGGTAAGGAACAACAACCCATTACGGCACGAGCTTCTTCTCCTTTGCAAATGTTTCCTA  
TGGTCAGCAGGACAGGGTGGCATTGGCCAACAATTTACCACAAAAGTGCCAATTCACAATAAGATAGGTTGCCCTGTG  
CCCAACATACTGGTAGAACTGAAGCAAGTGGGGATCATCATGAGGAGTTGGTTCCAGCTTCAGATGGTGGTACAGAGGGA  
CAGTTCTTTTCCCCCAGCCTGTGGTACATCCACCAGACTCTAAGTTTGTGGCTCTCATCCCTTTCTTTTCCGGTGAA  
CTCTAATGTTGGGACAGTTGTTTACACTTTACCGATTATTCGTACTTCTTTGAAGGATACTGAGTACGGCAGGTTTTACA  
AGGGATATCGCTACCTGCGGTGTAACCTACTGTTGATTAATTGGTTTCAGGTCCCATACAAGCTAAGGGTCTTCTGTGG  
CTTTGTTATGACCCTTCTGAACTTTGGCTAAATATCCAAGTAGAGAGAGGGCTTTGGCTCTACAAGGAACTTGGTTTTAT  
GCCTGGGCGGCATGATTCGGCGTCCCTGACTGTTATGGAATTAGCAACTCCAGCTGGCTTTTGTGACATGGACACTGATG  
TCAATGGAGCCTTTAAGGTGGTTATTATTAAGGATTTGGCTAATTTTGTATGTCACCGATTATGGTATGGAGCTTTCTTTG  
TACTTGAAGTAGAAAGGATAGGCTTGGGTGATATAACTGTTGGTGGAGAACTAACAAATTTTTATCCCCTGCGGCAGAT  
AGTACTTACTATGAGTTGCTACTACAACCTTCTAAAGGGAAGGCTTTAGTGCTACCCTTGAACCCCTTGCTGCCAGCTC  
ATGATGATGCTCAGTTTTATCCTAGCTGTTCTTCTCCATTTTAGAGAATCATAGATATTGGAAGGAACTCTTTCGTTA  
GAAGTGATTTTCAATATGCCTGCCATGGCTGGTGGTATTGCTGAACTGGCTTTTGTATGACACCTATGACCAGGCTGA  
TGGTGATACTTACCGCGTTTTGGTTCTTCTGTAGTTGATCTAAGGGCTCACCGTATATTAAGAGCTAGAGTGCCTCTTA  
GTGGATATGGGGGTTATCTTGCTGGTGGTTTCGGGCTCTTTTTGAGGTTAGGCCACAGACTGGTTTTGGGGACGTCCTA  
AAATTAGTTATTCTGTTACAGCCCCTCTCCATATAAGTGACACTTCGAAGAAAGGGTCTGTCCTTGTTAGGTATCTTGG  
TTTGGAGGATCTGGATTATTTAGAGCCAGCCACATCAATTGGGAGGCTGAATCCCAAACACCTTGGTGCCAAATACAG  
CTGCTTCTGGGGGGCCTATCATAAAGGTAGGTACTGCAGAATGGGAGGAACCTTTTATAGCTCGAGTTCCTTGGGCTTG  
CGCCAGAAGACTTTTTCGTCTGATGACAATAAATAAATGGTCTCCTTCTGGCTTTCTCTACTTTCTGTTTCTCCTGCGGT  
TCATTTACCGCGAACTGCTGGTGGTTTTGAGGCTTCACTGGAGCAGCAATGCCCTTAATGCATCGGAGCCAGGAGAATT  
GTCAATGGAGGGGCACTTTGAGGTACCATTTGACTGCCCGTCTAGAGGGAGCTACATTGCAGTCACTACTCCCTCACCGT  
TCTCTCACCTTTTCTGCTGTTCTCTTGAGCAAAATCCTTCCAGCACCTTGTTTTTGTGGATAATAGCACTTTTAAACCATT  
ACTTCTCTGCTGTCAGTGAGGGATACTTTCTCTTTGGAGCAGGATCATCCCTTTGTAGAGTTTTCTACTCTCCAGGAA  
GATGGATAAATACTCACTTTGGTGAAGTGAACAGTATACTGGCGTACTTGTCTGTGTGGGTTCTCCTCCAGTTCCTCA  
CCTAAAATATGGCGCAACTGCATGTAAGGGACGTGTCTTTGTGGGTGAACCGACTATAGAGTACAGACATCCTATGGG  
TGGTTTTCCATTAATCTTCTGAACCCCTACCAGCGCAAAGTACTTTTTGAGAACACTTTTAAATGTAGGTTGAGTTG  
TCTCTTTTCTTCTTCTATTATGGATCCTCCATACCTGCTTTTATTAGTTGTTTGTGGTTGTTGTATCCTACAATGTTTT  
GTTGTTTTCTCCTGGGGTCTCCCATGCTTTCTTTCATTGGTTAAGTGTGTTTGTACACCCCTTTGCTTTCTTTTGTTC  
CATAAAGGATTAACCAGGCATCCTCCTACTCTGGTAGGTTTAGTTCTGGCTTAGAAAAGCTTTAAAAAAAAAAAAAAAAA  
AAAAAAAAAAAAAAAAAAAAAAAAAAAAA

**CVX-A**

CCAACACCAAACCAACTCACTCACACCTATCCAACCTCAGAAGGGAGCTACCGTTACCGGTATATATTCTGTGGGATGGCT  
CGTGTGCGTGAAGTTTTCTCATCGATCACCGACTCGTCGCTTAAAGCCGTAATTCAGGAGGAGGCCTATAAGACCATCCA  
AACTCAATTACGACTCGCGCCACAATCAACCCATACTCACAACCCACCGACGCTGCTGATGTTTTAGAGAACCTTAGGAA  
TTATCACTAACCATTGGCCATTGAAGCCATACCCATGGGGCGGCAAGGCCATTGAAAATGACATGTATAACATAGTT  
GCTAATTATTTGCCAAGGAGAATCCAGTCACTTCTACTATATGAAGAAAGGCAAGCTCGGAAAATTTAGGAGAGGCC  
ACACCAGAATGATCGTTTTGTCAACTCCATTTTGGAGCCAAAGGACATAGCCCGATACCCAGAGGAAACGGTTGTGGAAC

**Additional file 3**

ACCTTGAGTCCACTCCCTGCACTACGAAGCTGGCTTTTCATGGGCGCACTCTCCACTTCTGGACGCCAAAGCAACTACTA  
ACTCTCTTTAACTTTAGTCCCAAATAACCACTCTCTACGCTACTATAGTCTTACCTATAGAGGCTACACATAGACTACC  
CTCTCTACACCCCGCCATATATACTCTGAAGTACTTCGGGGACTTCTTTATGTACATCCCTGGTGGACATGCAGGCGCCT  
CCTACACTCATCACCAGAAACAATACTAGCATGGCTTTTTGCCGGTCAAGTGTCTGGCCTAGGCATTAAGCTCACCATAACAG  
ATTCTGGAGAGCAAGGGTGCAAATCACCTGCTCATAATTCAAAGGGGTGATCTGCTCACTCCTCCCCTGAGGACTTTCGG  
CTCTGACTCCCCCTATGTACAAATCCCACCCATCTTCTCCCCAAAGACCATAATATGTCCCAGCCATCCCCACGGTGT  
TTGCAATGAAAATGTTTCATGTACACCAAGTCCCTGAAAGAGGTCACTCCGCGTGATCTTTATGCGAAAATGAGACAGCTG  
CTCCCGGACAAGGAACTGGCTAAATTCTCCCAAGCCACATTGTCCACATGATGAACTATTTCTTCTGCTCGGAAAATT  
AGACTCTGTGAATCACTTTGAAAATTTGCTATCAGGGTCAATCGTCCGCAGGACATTTAAGCCACTCATCGTCTGGTGGC  
AGCATTTTAAGGAAAAAATCAAGGGGCCGCTGACTTTACAAAGATCTGCAAAGCGATTCAGTGGACCAATCTCGACCTC  
ACATACAAAGTCCAATCCTTCACTCTCAGCACATGGGAGAATTTCTTCTCAAAGCAGATCACGCCTGAAGGGAAGAACGA  
CGAGGACTTTTCGGACTTCTGGGATCCGAACCTACAACCCCTTAGACTCTGTGGATGATTTAAATGCTGAGCAGCTTA  
AAGCCTGGGACTTCTGCAGCAGCGCAACACCGGCGCAACCCCTGAGCCAAAATTCATGACGATCCCCTTGAGAACAAG  
TCTAACAAGGAAAAGTGCCTGCGGAACGAAGGGACTCCACTGAGGGCCCTCAGACCAATCAGGCCTCTGCTCCACCCC  
ACACAATGACTCGCAGGCCCAATGAAGAGAAACCAGAGGCGCCGCTACTTCACCTCACCCAAAGTTTTCCACCACAC  
CCCACGGGGTGGTGGTACGCTTTTTCCCCGCTGATCGCGACTGCGAGGAAACCTGGGAACATTTATTATGGGCCATCTC  
AGGCTGTGCGACAAAGTTGGTCAGAGGCAGGTCACTCTCTATGCCAGAAATGGAAAGATAAAGACCTACAGTTACGAAA  
TGTAACCCACAAGGCTCAACCCTGGCCGCTGAGCTCACGGCCATCGCCAAAGCCCTTGATGTGCCTGAGGAGCAGCACC  
ACTGCCTCTTCCAGGTCTTCCAACAGGGAGCTGCAATCAACTTTCATCTGACGACGAGCCACTGATTCAACCAGGCTCA  
CCCATCACCCTCTTAGCATTGGGCATTGTGAACTGCTCACCAGGGATAAATCTACAAAAAAATTCACAAGCAACTCCT  
CTCCGGCCCCATCATCTACACCATGCCATCAGGCTTCCAGGAGACCCACCAACACTCAGTGCCTCCCTACAAAAGAACC  
GACTCTCCATCACTTTCCGCACCAGCGTGCCTGCAACCAAGAGGACACCCCTCCATGGCACAAGTGGCTGCCCATTTCTG  
AATGCAGCCGGGTTCAAAGGCAATCTGAGACAGGTCAATCCAATGACGGGTGCTCATTCTCCCAATCTCCGACATAAG  
AAAATGCCACAATTGAAGCTGGTGACCCAGGCTTGCTAGAGGTAATCAAGAAAATCCATAGGAGTCCCACACCCTTCA  
CATATGACCCACTCCGAGCCAAGGCTTTTTGGTTTCAGATGTCAAGAATCTCAGAGTAGGCGCCCTACTCCGACACCAGTCT  
AAAGAATGGCTTGAGAGCTTTTCCAGAAGGACGGAGAAAAGACAGCCGCTCTCTTGCTTAACGGTCAATCATGGTGTGG  
GGGAGCGGCAAGTCTCAGGCACTGCAGGACTTCTCCGGGCAACCCAGACAATCGCATAACGGTGGTCTGCCACCA  
ATGAGCTGAGACTCGACTGGGTACGCAAATGCCACAAGCCATCCTTCTCTCAAGACCTTTGAGAAGAGCCTGCTC  
GCGCCAGCCAGTTCTACTACTATCATGGACGACTACTCCAAGCTTCCCGCGGGATTTCATTGAGGCCTACATCGCAAACA  
CCCCGGACTGGAGTGTCTGATACTACAGGGGATTCAAAGCAAAGCCACCACCATGAGCCTAACGACGGAGCCATGACCA  
GCAAATGTCGCCATTCCTGAGACCGGCTCACTCCACTGCAGATACTACCTCAATGCCACACACCGCAACAGGCAGGAC  
CTGGCGAACATGCTCGGAGTCTACTCAGAGGTTGAGGGACGCACTAACATCACCATGGACACCACCTTCTTCCCGGAG  
GCATCTGCTCGTCCCATCCATGTTCAAGAAACAAGCATAACGGGAGTTAGGACACAAGGTCTCAACCTACGCCGGTGTG  
AAGGAATCACGGCGAATGAGATCCAAATACTGATTGACTCTGACACCCCAATGTGCTCCAGCAGGTCATGTACACCGCC  
CTCAGTAGGGCCGTGCATGCCATTCCTCGTCAACACAGGGATAAACAATGATGCCTTCTGGAACAAGCTGGCAGCCAC  
GCCCTATCTCGCGCATTCTGAGGTTGGTCCGGGAAGAGAAGACGAAAGAGCATCAACCTACAGAAGAGGGGGCCAGTG  
CACCGCCCGCTCCCGAGACCCACTTCCAGTGGAGAACGAGTCCACATTTCTTGACAAGGTCACAGACAACATGCCGGAG  
AAGCATGAGAGGGAATCTTTTCCACTCGCGATGGTTTCAGCAATTGCGTCCAGACTGAAGATCCCATCATCCAAATGTT  
CCCCACCAACAAGCAAAAGATGAGACTCTCTTCTGGGCAACAATTGAGGCTCGGCTGAAGATAACGAGCCCAGAGAAGA  
ACTTCACTGAGTTCATCTCCAAGAAGCACATTGGGGACATTTCTTCTCGAGAATTACAAGCTTGCCATGGGGCTCCCAAAA  
GAACCAATCGCCTTTCGACGAACGTCTTTGGAAGTGTGCGCGGACGAGGTGCAGAAGACCTACCTGTCTAAGCCACTGCA  
CATGCTTCAAACGGACAGGCTCGGCAGTCCCCTGACTTCGACCCCAAAATGATCAGCCTCTTCTCAAGTACAATGGG  
TTAAGAAGATTGAGAACTTGCCAACCGCGCATTAAAGGCTGGGCAGACCATCGCCTTTTTCAACAAGAGGCAGTCATG  
CTTTACGGAACAATGGCTCGATACATGAGGCGTGTCCGCGAGGCTTTTACGCTAAGAATATCATGATCAACTGCGAGAA  
GACCCCTGAAGAGCTTACCAGCTGGGCAGCCGAGCACTGGAAGTTCATCGCAATTCATATGCCAACGACTACACGGCTT  
TTGACCAGTCTCAGGACGGTGCATGCTCCAATTTGAAATTTCTCAAAGCTAGGCACCCTCTATCCCGGAAGTGTACATT  
GAGGGCTACCTGGACTTGAAATGCTCATCCAAGACCTTCTTGGCATACTGAAAATCATGCGACTCACTGGAGAGGGGCC  
TACTTTGACGCCAACACTGAATGCAACATCGCCTTCCGCCACACCAAGCTGAAAATACCAATCGGCACTGCTCAGCTCT

**Additional file 3**

ACGCGGGTGATGACTGCGCCTTTGACTACGCCCCAGAGGATAAGCCAAGCTTCAAAATGATCGAGACCGAGGTCTCCCTC  
AAAGCCAAACCGGTCATCAAAAGGCAGGTCCAAGGGGAATGGGCAGAATTTTGTGGGATGTTAGTTACCCCCCTTGGCGT  
CATCAAGGACCCCATCAAGACCTGGGCGGCACTGAAACTTGCCGAAAAGAGAGGGCGACATGAAAGACATGAGGGATAGTT  
ATGAAAGAGATGTCTGCCTTGCTACCAGCACAAAGGACGCTCTCCACTCAATCTTCTCAGAAGAGCAATCCATGGCCCAT  
CAATTAACCGTTTCGAAAGATCATCAAAGCAGGTGGAGGCCGTGTTTTCTCAACTTTTGACTGATGGAGACGCTAACTGCC  
CTACTAATTGCTAACGGATACACTAGGACTGACTTGCCCATTTCAAAACCCCTTAGTCATCCATGCTGTGGCCGGTGCAGG  
AAAGACCACCCTGATTAGGCAATTTCTACACCAACTCGGCCACGAATGCTCAGACGTTAGGCACGCCAGACAAGCCCA  
ACCTCTCTAGGAAGATGATCCGACAGTTTTCAATGCCCAAGGCCAACCATTTCAACATCCTCGATGAGTACTGTGCACAG  
CCTCTGAAAGGAAGTTGGGATGCGGTGTTGCGCCGACCCTCTCCAGCATCCTGACTATGCCCTGGAACCCCATTTTATCAA  
AGAGACCTCCCACCGACTTGGTCCAAGCACATGCGAGCTGATCTCCAGCCTTGGAAATCCTCATTTATCCCAGACTCAGAGG  
ATCAAGTAGTCACAAGGAAAGGGTTTTTCGAGTCTGAACTCTTCGGTGTAGTCATAGCCCTTGACGAAGCCATTTTCCAA  
CTCGCGAGCAGGCACGGACTCAAACCGCTCTGCCCCAAAGCAACCATTGGCCTCCAATTCCTGTGTCGACAGTTCTATC  
TTCTCTCGCCCTCGAGCAGGTTGAAGACAGTACAGCGCTCTACATTGCGCTTACGCGTCACACAAAAGAAGTCCATGTCC  
GGTGCCCCACTGAGGCTGACGCCACCACCTGACCACACTAGAATCCTCTCCACTAACCCTAGGCTTAGGACTATCGCT  
AGTAGTATTCGCGCTGACTAGGTCCACATTACCCAGTGTGCGGGACTCTTCCACAGTTTACCACACGGAGGCTGGTATC  
GTGACGGCACGAAAACAGTCTTCTACTCAGGCCCTAAGAAAACGGCCATTAAGTGGAGTCCACCCCTCTTTGTCTTTTTT  
CTGACTTTAGCCATCTATGTTTCTTACCTATTTGAGTCTAGGAGTCGTGCTGGGCCTTGCAAGTATTGCGGGTCTAACCA  
CACTTAACACCCCTAGTTGTCTGATCGTCTTGTGCGGGTGACCAGACTGTTGTGAGGGGCTGTGAACACGTTGGCAATCTC  
GCTGACGTCATCACGGCACTCAATAACCGCTTAAGTTTCAACAAATGTGAAAATCAAACTAATCATGTCTACTACTGG  
AGTCCAGTCTTCTCAGTCTCCGGACCCCGCTCCACTCCTCAGTCCGGACCTTTCCAAACCTTGTCTCCTCCCAGCTTG  
CGGCCCTCTCACTCGGGTCACTAGTCTCTTCTACCTTCCCAGCTGAGCTAGTCAGCATCTCACAAAGCCCTGACCACC  
CTAGGCGCGTCTGCCACTAACCTCACTCCACTATCACTAGAAATAGTTAATTACTGCTTTGACAACGGGTCTTACCAGA  
AACAGTCTTCAAAGGTGACTCAACCGTGTCCAGATGCCGCTCTCCAAAGTCGCCCATGCTATCACCAATTCACCACTC  
TGAGACAATTCTGCAGATACTTTGCGAAGATTATCTGGAATTATCGAGTTTCAAAGAATCTCCCTCCAGCGGCATGGGAA  
GCCTGGGCCTACAAACCCGAGCAAAAAGTTTGCTGCCTTCGACTTCTTCGACGGCGTTCTCAATGAGGCGGCCCTCAACCC  
TACAGATGGACTTGTGCGTGTACCTAACGAGGCTGAACGACTCGCCAACCAAATAATCGCAACGTCCATCTCTTTGAGA  
GCAACGCACAAAAGAACAGAGCCCTTACCACTTCGGCTCTAGTCACCAAGGGGCTCCAAGGTTGAGAGTCTCCAAGGATT  
CAATTTCTCCCAGGCCCTGAGTAGTTTLAGAGATGAACAAGGCTCCCGCAGTAGCTCCCACCGGGTTCCAAGTGTGCCTA  
TCCAGCTTAAGTAAATAAGCCTAGCCTTCTGTTTTAATGCAAG
